# Supplementary material
Source: MDPI journal article supplement (https://www.mdpi.com/2071-1050/15/3/2332)
Supplement: s1 [file s1]

## **List of Figures**

**Figure S1.** Data collection and analysis flowchart.

**Figure S2.** Annual number of published documents and cumulative number of citations.

**Figure S3.** Annual scientific productivity of different countries.

**Figure S4.** (a) Network map of keyword co-occurrence; (b) Collaboration network among different countries.

**Figure S5.** Contingency matrix of (a) keywords and year of publication and (b) keywords and country.

**Figure S6.** SA/CA ratio of stormwater treatment wetlands in different land uses.

**Figure S7.** Usage rate of filter media and substrates used in stormwater treatment wetlands.

**Figure S8.** Distribution of the most commonly used plants in stormwater treatment wetlands.

**Figure S9.** Typical water quality parameters investigated in stormwater treatment wetlands research.

**Figure S10.** Synopsis of pollutant concentrations in the runoff and stormwater treatment wetlands effluent.

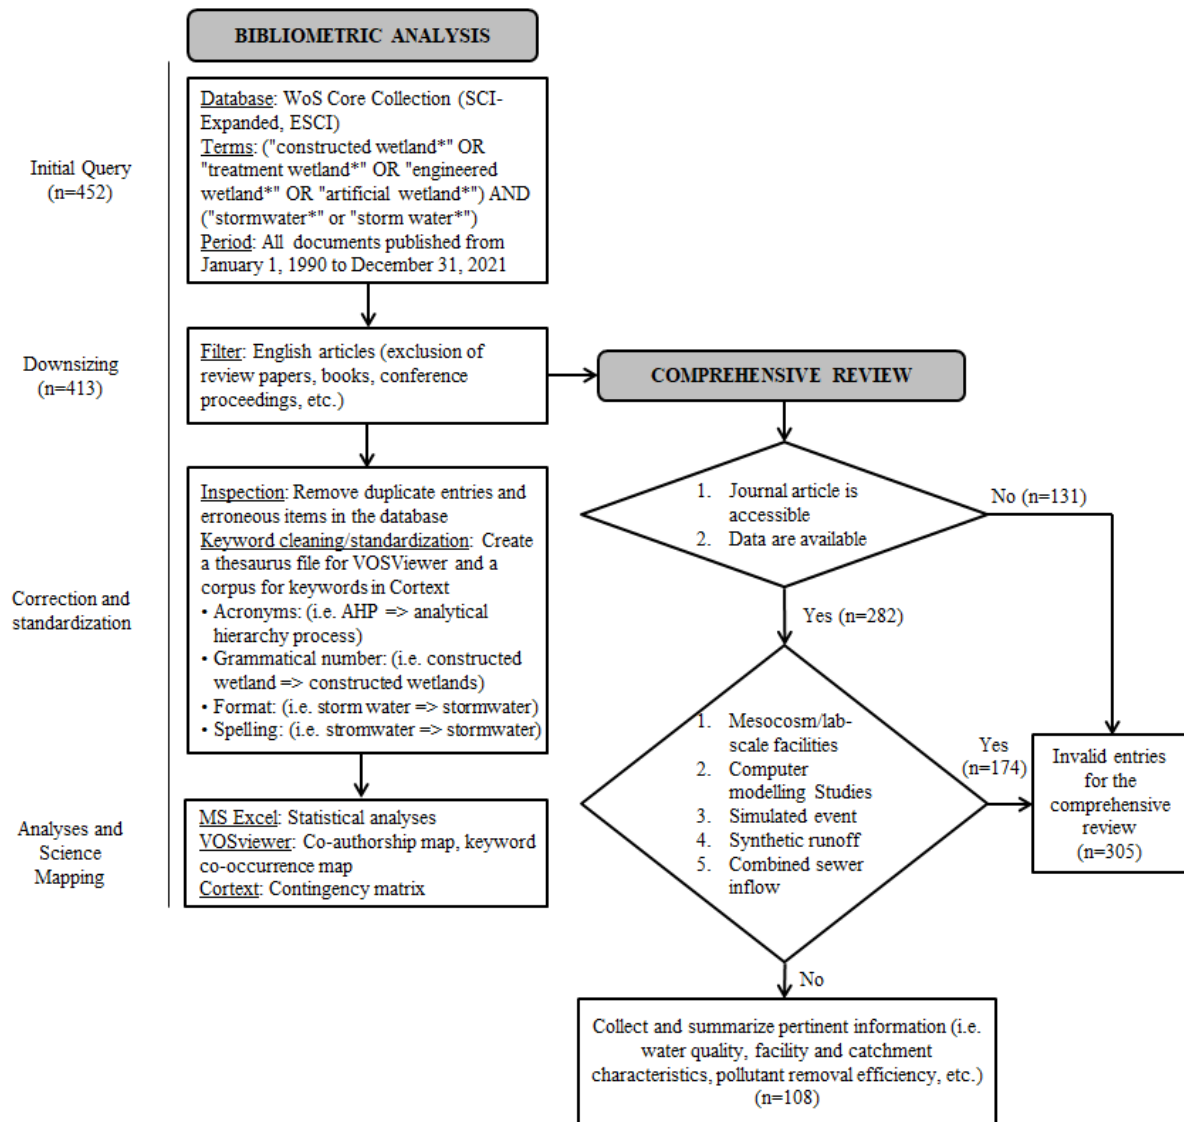

**Figure S1.** Data collection and analysis flowchart.

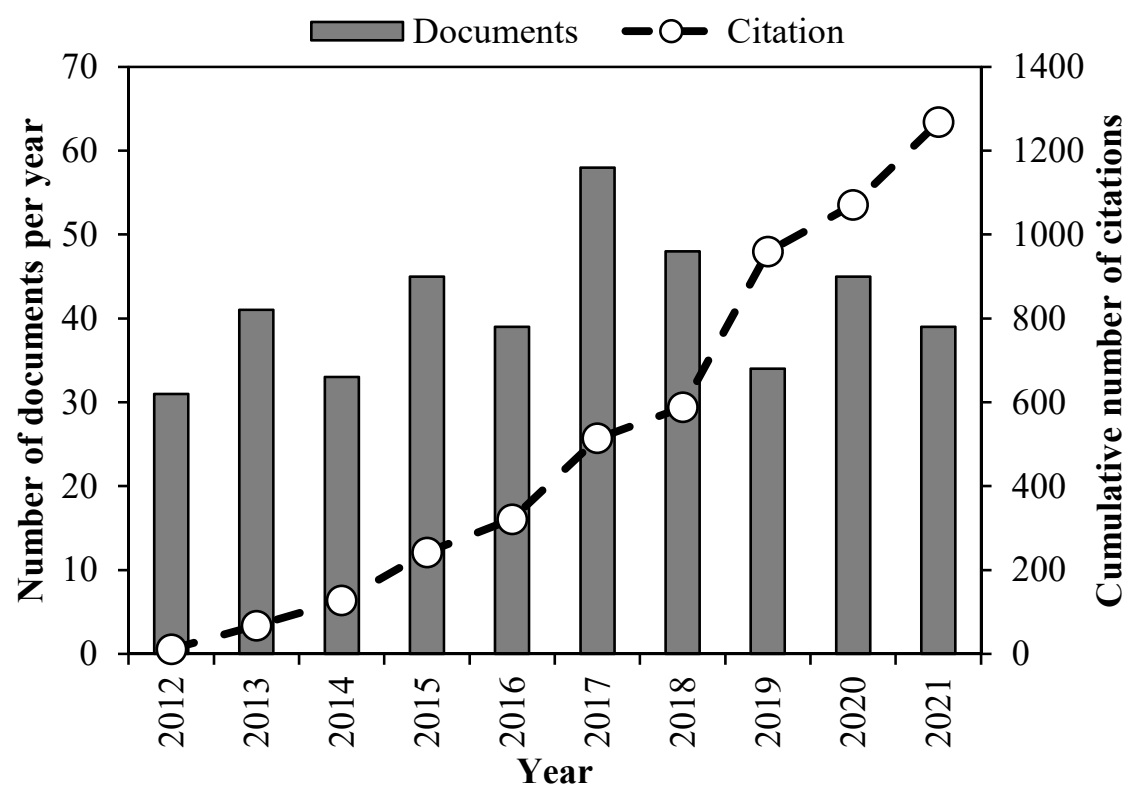

**Figure S2.** Annual number of published documents and cumulative number of citations.

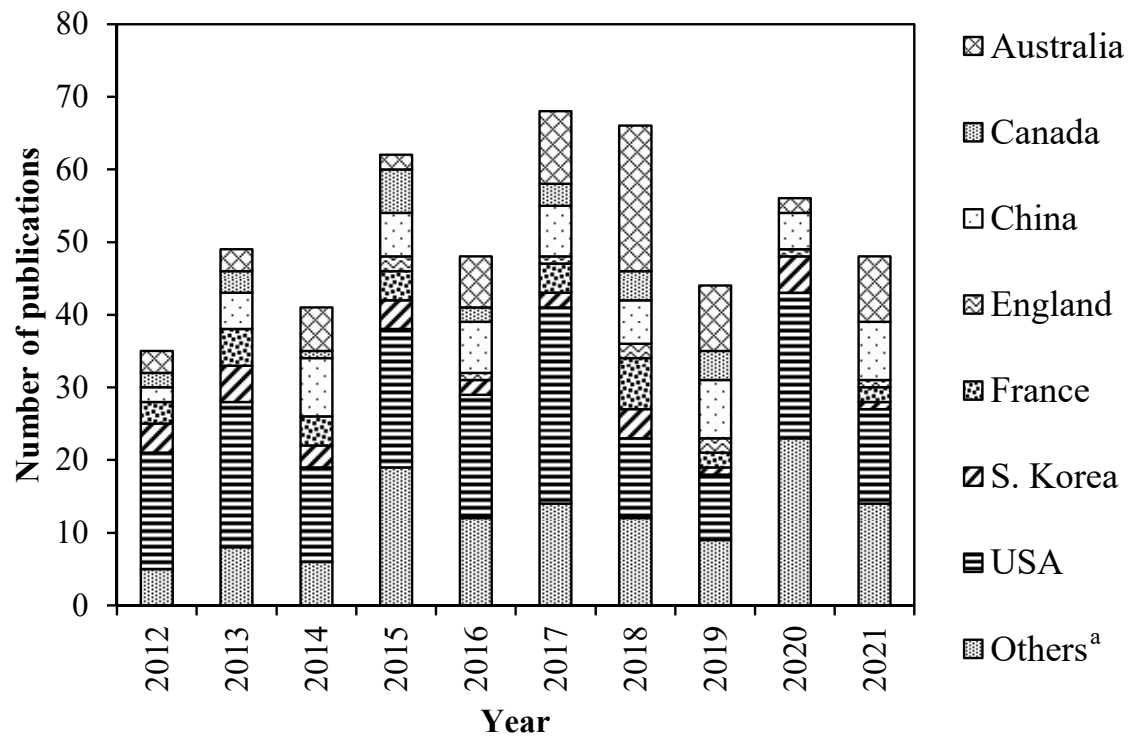

**Figure S3.** Annual scientific productivity of different countries.

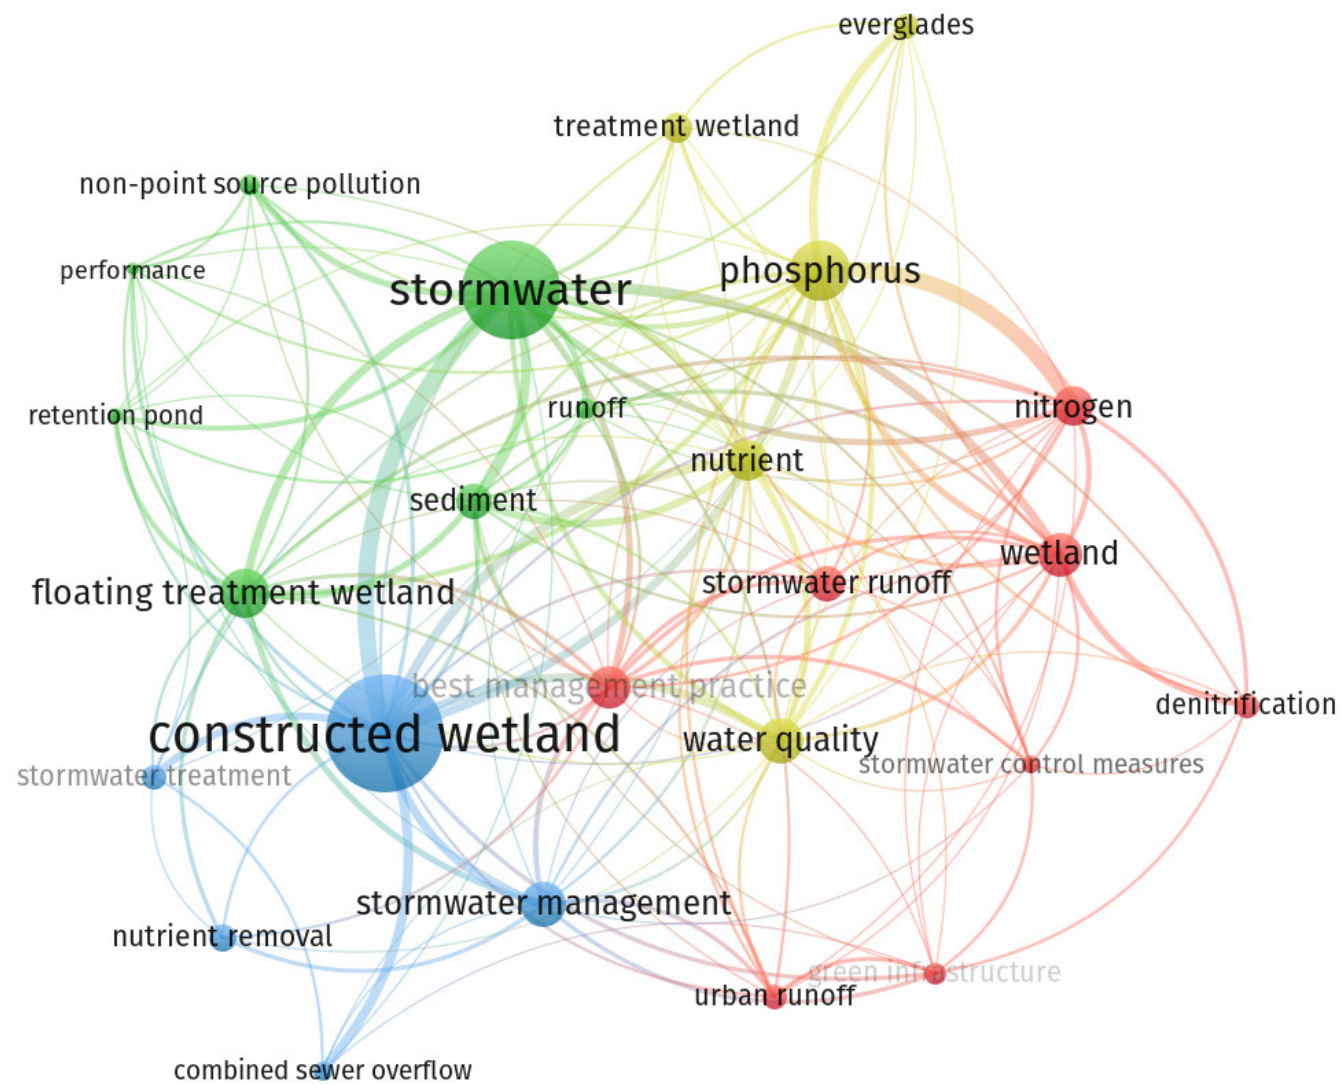

**Figure S4a.** Network map of keyword co-occurrence.

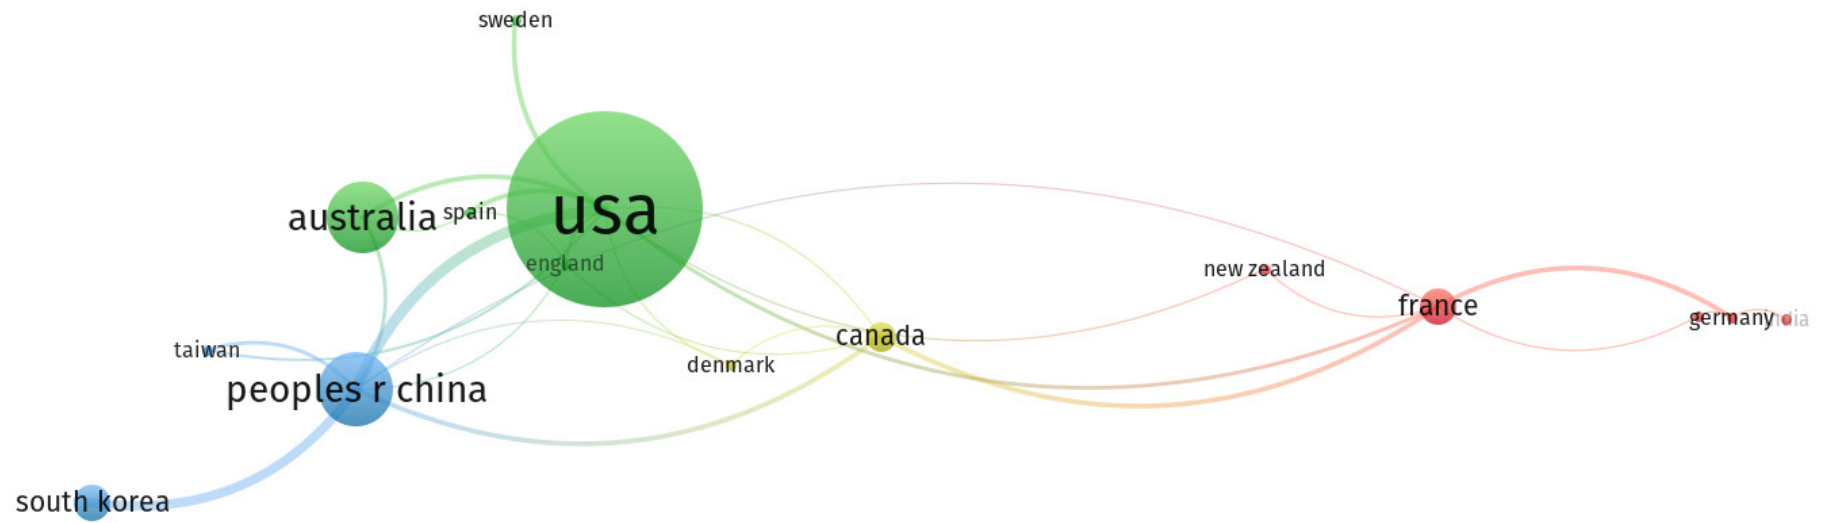

**Figure S4b.** Collaboration network among different countries.

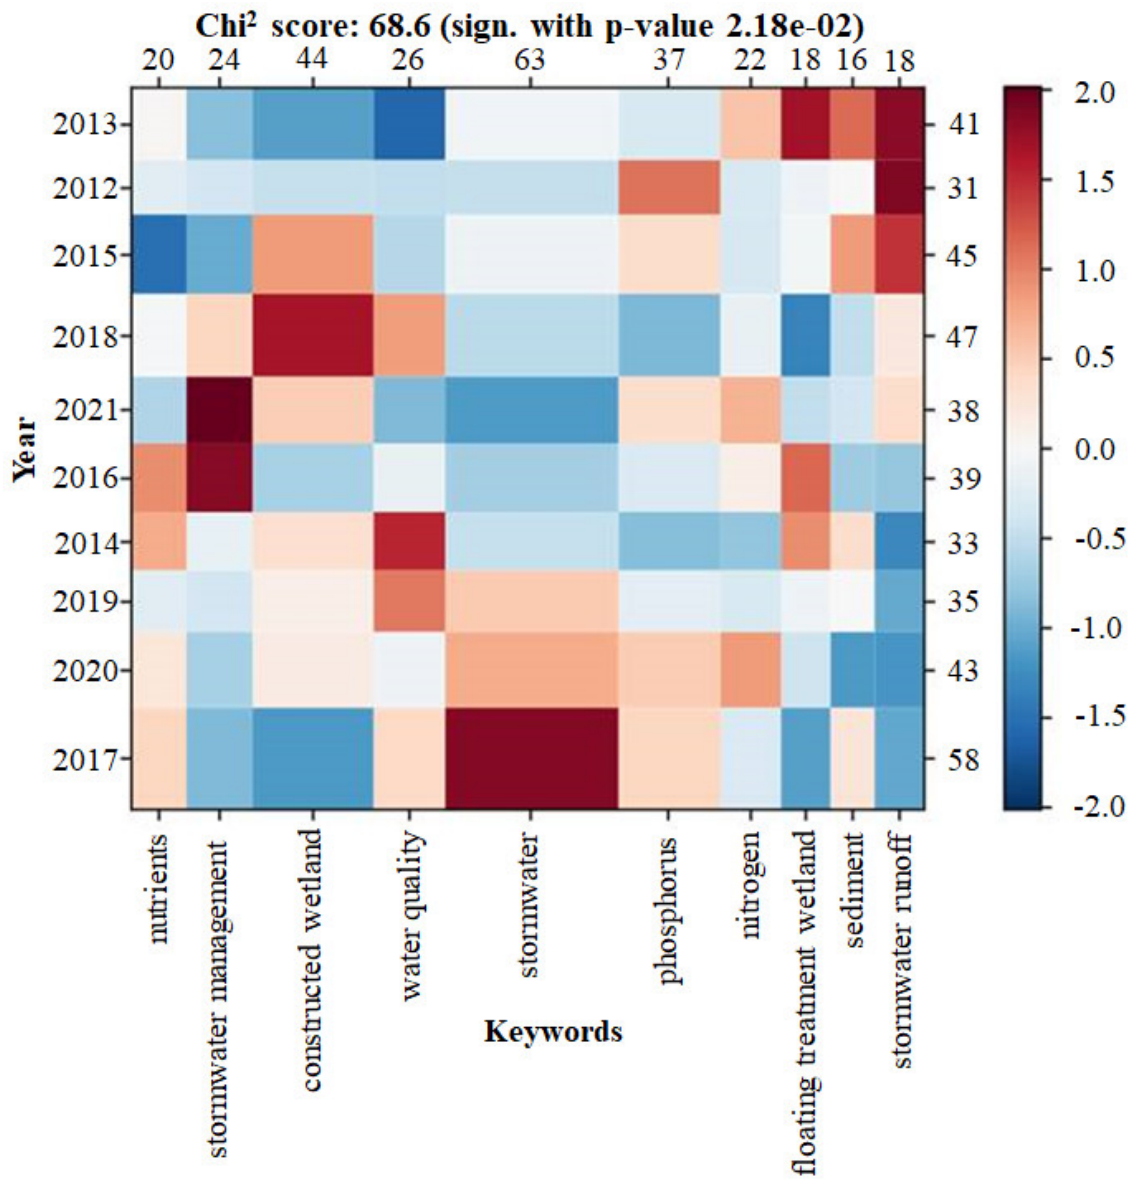

Figure S5a. Contingency matrix of keywords and year of publication.

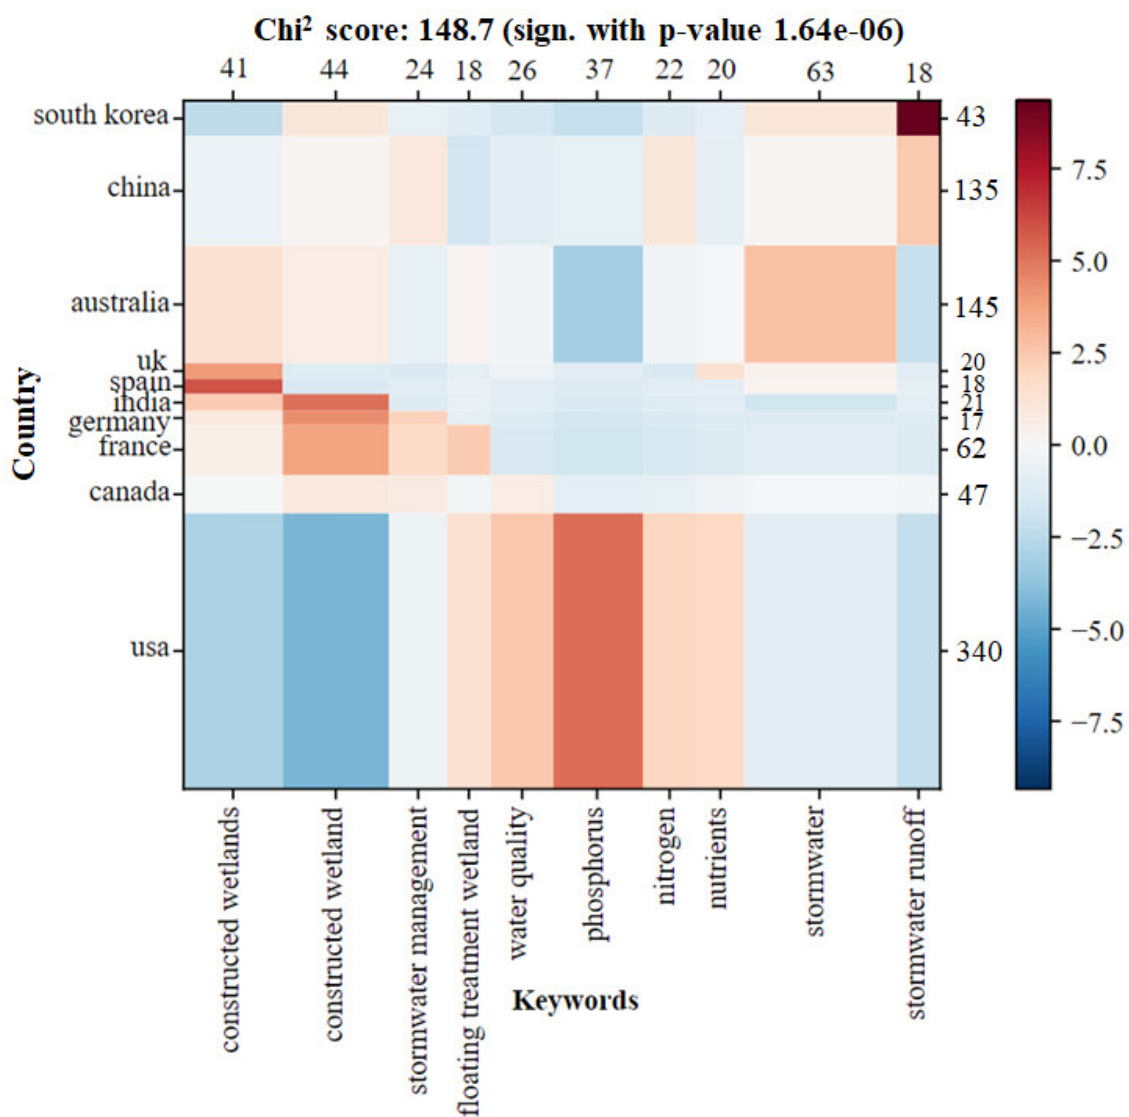

**Figure S5b.** Contingency matrix of keywords and country.



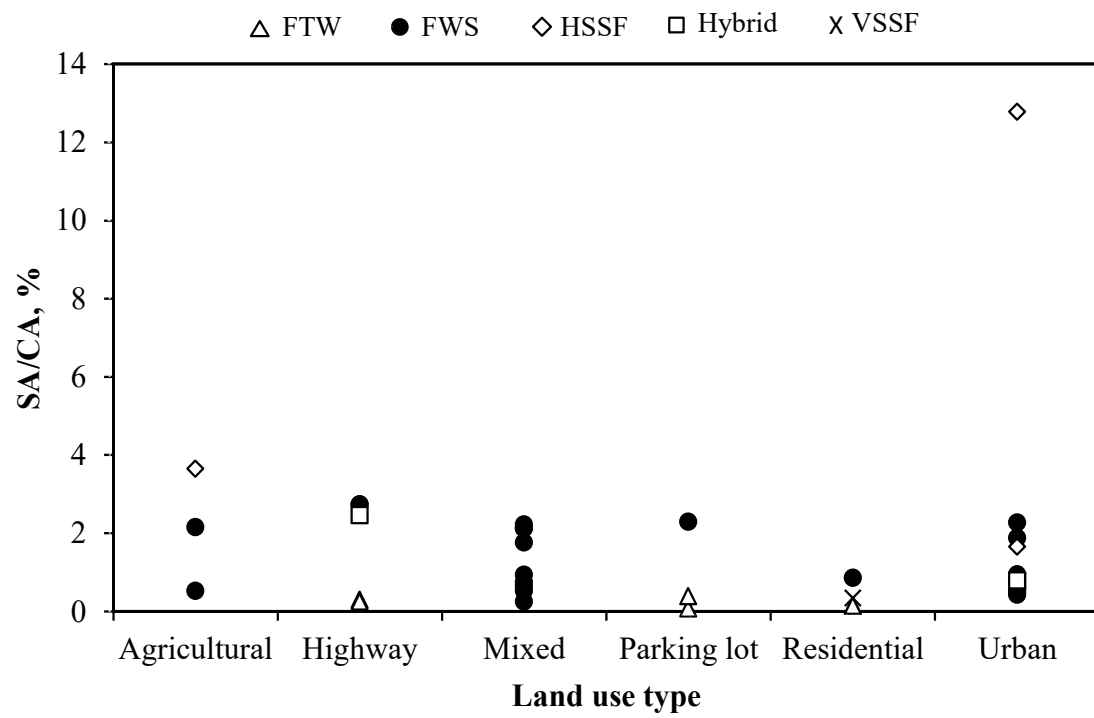

**Figure S6.** SA/CA ratio of stormwater treatment wetlands in different land uses.

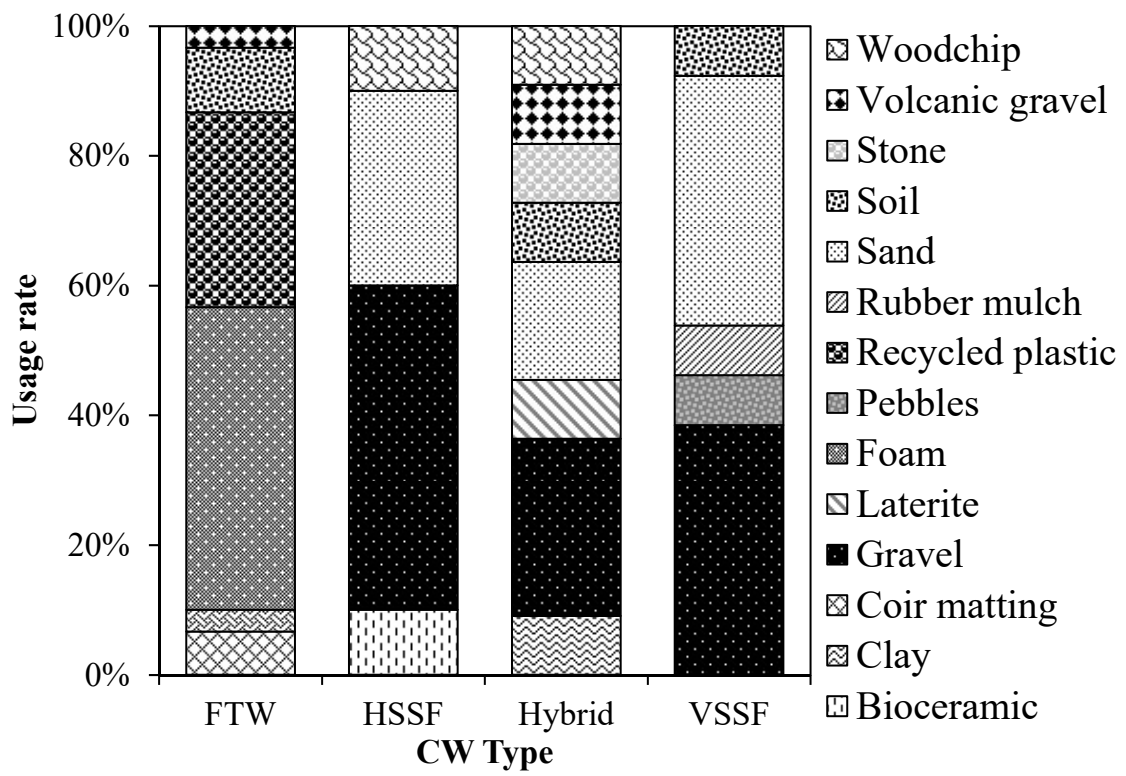

**Figure S7.** Usage rate of filter media and substrates used in stormwater treatment wetlands.

*Typha*
 *Juncus*
 *Carex*  
 *Phragmites*
 *Schoenoplectus*
 *Others*

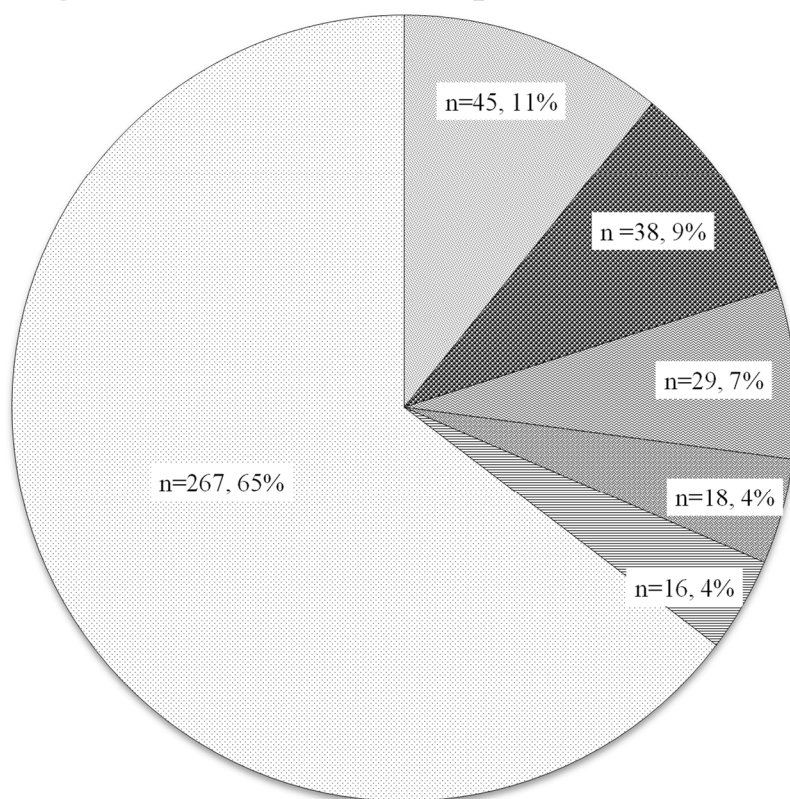

**Figure S8.** Distribution of the most commonly used plants in stormwater treatment wetlands.

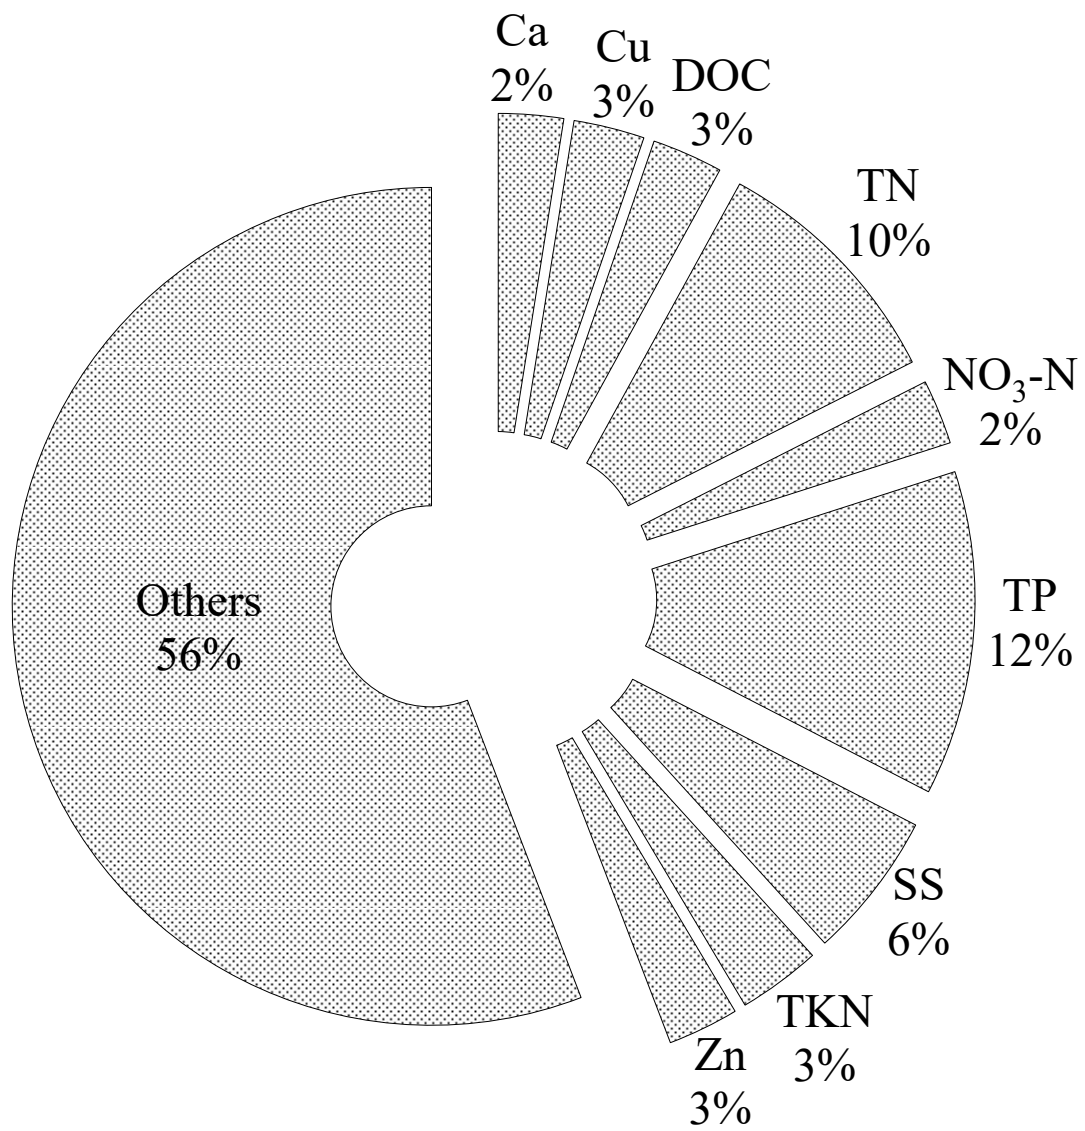

**Figure S9.** Typical water quality parameters investigated in stormwater treatment wetlands research.

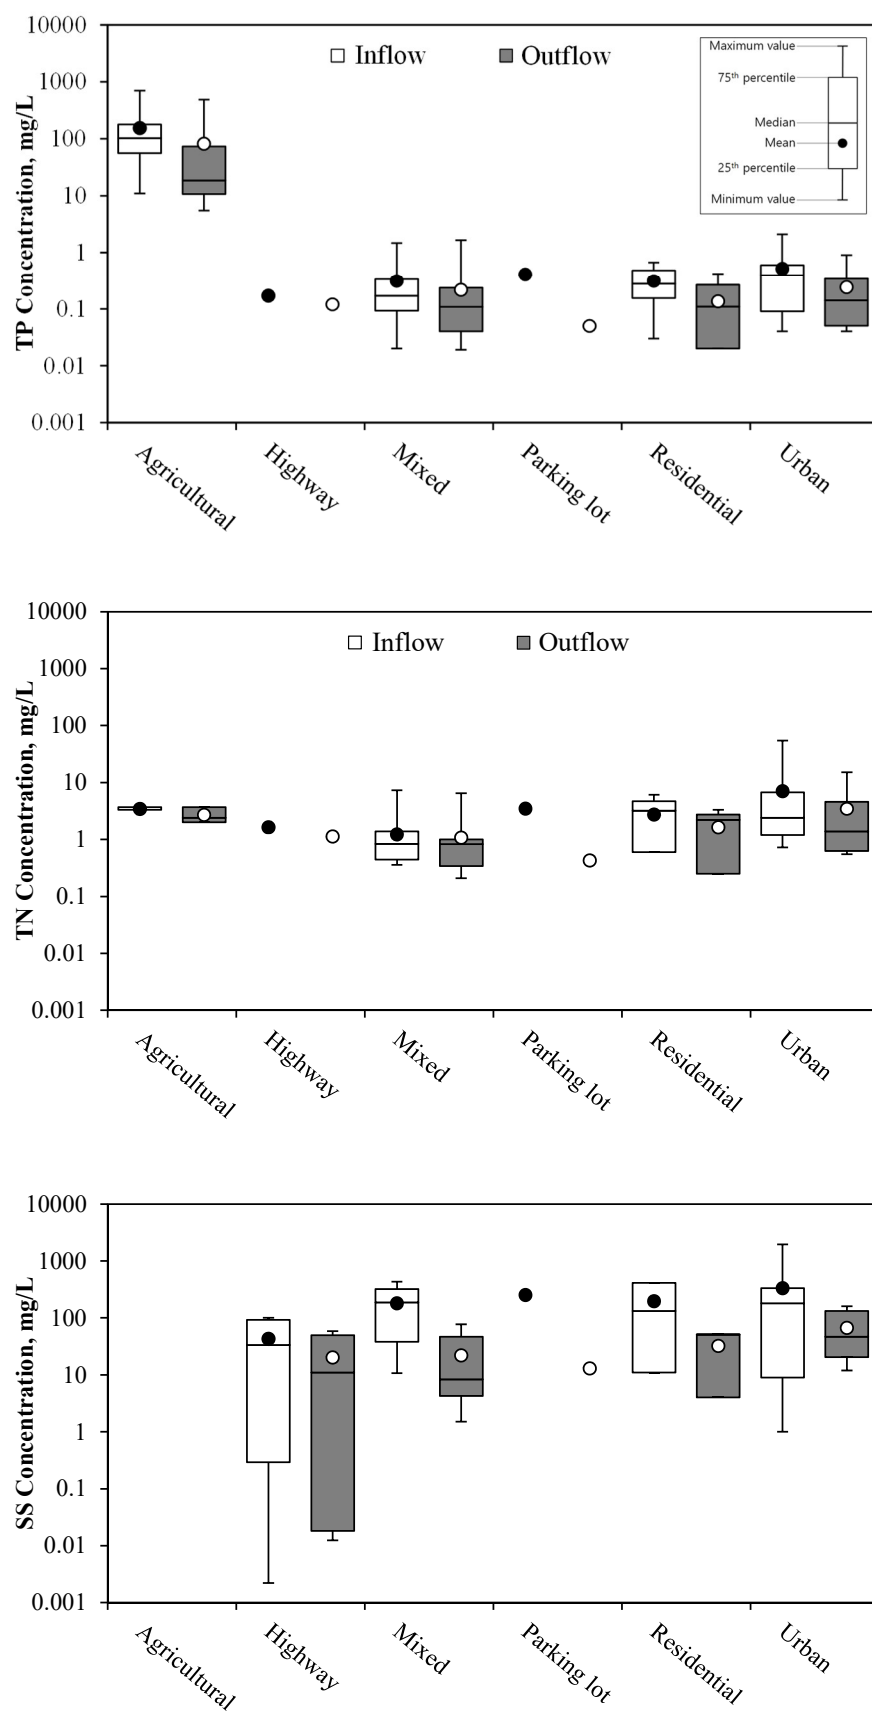

**Figure S10.** Synopsis of pollutant concentrations in the runoff and stormwater treatment wetlands effluent.
