# Supplementary material
Source: MDPI journal article supplement (https://www.mdpi.com/2071-1050/15/3/2332)
Supplement: s1 [file s1]

## **List of Tables**

**Table S1.** Data inputs and methods of analyses used in VOSviewer and Cortext.

**Table S2.** Major subject areas relevant to constructed wetlands and stormwater management research.

**Table S3.** List of most productive journals in terms of the number of publication.

**Table S4.** List of highly-cited publications

**Table S5.** Drainage areas (in ha.) of dominant land use types in reviewed scientific publications.

**Table S1.** List of plants used in stormwater treatment wetlands.

**Table S1.** Data inputs and methods of analyses used in VOSviewer and Cortext.

| Software                           | Parameter                       | Inputs/Method of analysis                       |
|------------------------------------|---------------------------------|-------------------------------------------------|
| VOSviewer<br>(Network map)         | Bibliographic database file     | WoS plaintext file                              |
|                                    | Type of analysis                | Co-occurrence                                   |
|                                    | Unit of analysis                | Author keywords                                 |
|                                    | Counting method                 | Full counting (terms have the same weight)      |
|                                    | Minimum number of co-occurrence | 5                                               |
| Cortext<br>(Contingency<br>matrix) | Bibliographic database file     | WOS plaintext file                              |
|                                    | Field values                    | Author keywords – Country                       |
|                                    | Contingency analysis measure    | Author keywords – Year of publication           |
|                                    | Number of nodes                 | Chi <sup>2</sup><br>10 (Default software value) |

**Table S2.** Major subject areas relevant to constructed wetlands and stormwater management research

| <b>Subject area</b>              | <b>Number of Documents</b> | <b>% of Total</b> |
|----------------------------------|----------------------------|-------------------|
| Environmental Sciences Ecology   | 334                        | 80.87%            |
| Engineering                      | 204                        | 49.40%            |
| Water Resources                  | 146                        | 35.35%            |
| Geology                          | 19                         | 4.60%             |
| Marine Freshwater Biology        | 19                         | 4.60%             |
| Science Technology Other Topics  | 16                         | 3.87%             |
| Meteorology Atmospheric Sciences | 11                         | 2.66%             |
| Others*                          | 68                         | 16.46%            |

*\*Subject areas with less than 10 documents*

**Table S3.** List of most productive journals in terms of the number of publication

| <b>Journal</b>                       | <b>Impact factor<br/>(as of 2020)</b> | <b>Number of<br/>Documents</b> | <b>% of Total</b> |
|--------------------------------------|---------------------------------------|--------------------------------|-------------------|
| Ecological Engineering               | 4.035                                 | 83                             | 20.10%            |
| Science of the Total Environment     | 7.963                                 | 26                             | 6.30%             |
| Water                                | 3.103                                 | 22                             | 5.33%             |
| Water Science and Technology         | 1.915                                 | 21                             | 5.08%             |
| Desalination and Water Treatment     | 1.254                                 | 17                             | 4.12%             |
| Water Research                       | 11.24                                 | 14                             | 3.39%             |
| Journal of Environmental Engineering | 1.746                                 | 11                             | 2.66%             |
| Others*                              | -                                     | 219                            | 53.03%            |

*\*Journals with less than 10 publications*

**Table S4.** List of highly-cited publications

| <b>Title</b>                                                                                                                                         | <b>Author/s</b>                                                                                              | <b>Journal (Year)</b>         | <b>Total number of citations</b> |
|------------------------------------------------------------------------------------------------------------------------------------------------------|--------------------------------------------------------------------------------------------------------------|-------------------------------|----------------------------------|
| Improving Urban Stormwater Runoff Quality by Nutrient Removal through Floating Treatment Wetlands and Vegetation Harvest                             | Bing, X., Xue W., Liu J., Jiaqiang, W., Zhao, Y., & Cao, W.                                                  | Scientific Reports (2017)     | 101                              |
| Evaluation of floating treatment wetlands as retrofits to existing stormwater retention ponds                                                        | Winston, R. J., Hunt, W. F., Kennedy, S. G., Merriman, L. S., Chandler, J., & Brown, D.                      | Ecological Engineering (2013) | 97                               |
| Floating treatment wetland aided remediation of nitrogen and phosphorus from simulated stormwater runoff                                             | White, S. A., & Cousins, M. M.                                                                               | Ecological Engineering (2013) | 80                               |
| Floating treatment wetland retrofit to improve stormwater pond performance for suspended solids, copper and zinc                                     | Borne, K. E., Fassman, E. A., & Tanner, C. C.                                                                | Ecological Engineering (2013) | 77                               |
| Temporary Storage or Permanent Removal? The Division of Nitrogen between Biotic Assimilation and Denitrification in Stormwater Biofiltration Systems | Payne, G., Fletcher, T., Russel, D., Grace, M., Cavagnaro, T., Evrard, V., Deletic, A., Hatt, B., & Cook, P. | PloS one (2014)               | 67                               |

**Table S5.** Drainage areas (in ha.) of dominant land use types in reviewed scientific publications

| Land use type      | Agricultural | Highway | Mixed   | Parking lot | Residential | Urban   | Others* |
|--------------------|--------------|---------|---------|-------------|-------------|---------|---------|
| Frequency, n       | 41           | 10      | 25      | 7           | 12          | 54      | 5       |
| Minimum            | 0.81         | 0.13    | 3.60    | 2.31        | 2.00        | 0.04    | 0.09    |
| Maximum            | 86000.00     | 13.07   | 3139.00 | 2.37        | 572.00      | 2060.00 | 2.30    |
| Median             | 42.70        | 1.70    | 320.00  | 2.37        | 5.40        | 95.00   | 0.45    |
| Average            | 7876.51      | 3.01    | 781.30  | 2.35        | 76.51       | 271.86  | 0.82    |
| Standard Deviation | 24704.92     | 4.14    | 1059.91 | 0.03        | 176.99      | 465.53  | 0.90    |

\*Land use types with a frequency of less than 5 (i.e. suburban, grassland, municipal, etc.

**Table S1.** List of plants used in stormwater treatment wetlands.

| Species                            | Genus         | Species                                                  | Genus         |
|------------------------------------|---------------|----------------------------------------------------------|---------------|
| <i>Acorus calamus</i>              | Acorus        | <i>Carex vulpinoidea</i>                                 | Carex         |
| <i>Acorus gramineus</i>            | Acorus        | <i>Carex flacca</i>                                      | Carex         |
| <i>Aeschynomene indica</i> L.      | Aeschynomene  | <i>Carex lacustris</i>                                   | Carex         |
| <i>Agrostis alba</i>               | Agrostis      | <i>Carex lupulina</i> Muhl. ex Willd                     | Carex         |
| <i>Agrostis hyemalis</i>           | Agrostis      | <i>Ceratophyllum demersum</i>                            | Ceratophyllum |
| <i>Alisma plantago-aquatica</i>    | Alisma        | <i>Cladium jamaicense</i> Crantz                         | Cladium       |
| <i>Alisma subcordatum</i>          | Alisma        | <i>Cyperus difformis</i> L.                              | Cyperus       |
| <i>Alisma triviale</i>             | Alisma        | <i>Cyperus eragrostis</i>                                | Cyperus       |
| <i>Alternanthera philoxeroides</i> | Alternanthera | <i>Cyperus papyrus</i>                                   | Cyperus       |
| <i>Andropogon gerardii</i>         | Andropogon    | <i>Cyperus rutundus</i>                                  | Cyperus       |
| <i>Asclepias incarnata</i>         | Asclepias     | <i>Daucus carota</i>                                     | Daucus        |
| <i>Aster puniceus</i>              | Aster         | <i>Echinochloa crus-galli</i> (L.) P.Beauv.              | Echinochloa   |
| <i>Aster simplex</i>               | Aster         | <i>Eclipta prostrata</i> (L.) L.                         | Eclipta       |
| <i>Atriplex patula</i>             | Atriplex      | <i>Eichhornia crassipes</i>                              | Eichhornia    |
| <i>Baumea juncea</i>               | Baumea        | <i>Eleocharis acicularis</i>                             | Eleocharis    |
| <i>Baumea articulata</i>           | Baumea        | <i>Eleocharis interstincta</i>                           | Eleocharis    |
| <i>Baumea preissii</i>             | Baumea        | <i>Eleocharis palustris</i>                              | Eleocharis    |
| <i>Baumea rubiginosa</i>           | Baumea        | <i>Eleocharis pseudoalbibracteata</i> S.González &Guagl. | Eleocharis    |
| <i>Bidens cernua</i>               | Bidens        | <i>Eleocharis sphacelata</i>                             | Eleocharis    |
| <i>Bidens frondosa</i> L.          | Bidens        | <i>Eleocharis acuta</i>                                  | Eleocharis    |
| <i>Bidens laevis</i>               | Bidens        | <i>Elymus canadensis</i>                                 | Elymus        |
| <i>Bidens vulgata</i>              | Bidens        | <i>Epilobium coloratum</i>                               | Epilobium     |
| <i>Bolboschoenus caldwellii</i>    | Bolboschoenus | <i>Eriocaulon miquelianum</i> Körn.                      | Eriocaulon    |
| <i>Bolboschoenus medianus</i>      | Bolboschoenus | <i>Filipendula ulmaria</i> L. (Maxim.)                   | Filipendula   |
| <i>Brachiaria mutica</i>           | Brachiaria    | <i>Fraxinus pennsylvanica</i>                            | Fraxinus      |
| <i>Butomus umbellatus</i>          | Butomus       | <i>Glyceria fluitans</i>                                 | Glyceria      |
| <i>Calamagrostis canadensis</i>    | Calamagrostis | <i>Glyceria striata</i>                                  | Glyceria      |
| <i>Calix Cinereal</i>              | Calix         | <i>Helenium autumnale</i>                                | Helenium      |
| <i>Canna flaccida</i>              | Canna         | <i>Hibiscus moscheutos.</i>                              | Hibiscus      |
| <i>Canna indica</i>                | Canna         | <i>Hydrilla verticillata</i>                             | Hydrilla      |
| <i>Cardamine lyrata</i> Bunge      | Cardamine     | <i>Hydrocotyle umbellata</i>                             | Hydrocotyle   |

| Species                                         | Genus        | Species                                              | Genus          |
|-------------------------------------------------|--------------|------------------------------------------------------|----------------|
| <i>Carex appressa</i>                           | Carex        | <i>Impatiens textori</i> Miq.                        | Impatiens      |
| <i>Carex bebbii</i>                             | Carex        | <i>Iris ensata</i> var. <i>spontanea</i>             | Iris           |
| <i>Carex comosa</i>                             | Carex        | <i>Iris pseudacorus</i> L.                           | Iris           |
| <i>Carex hystericina</i>                        | Carex        | <i>Iris versicolor</i> L.                            | Iris           |
| <i>Carex riparia</i>                            | Carex        | <i>Juncus cyperoides</i> Laharpe.                    | Juncus         |
| <i>Carex scoparia</i>                           | Carex        | <i>Juncus effusus</i> L.                             | Juncus         |
| <i>Carex stricta</i>                            | Carex        | <i>Juncus kraussi</i>                                | Juncus         |
| <i>Carex virgata</i>                            | Carex        | <i>Juncus pallescens</i> Lam. var. <i>Pallescens</i> | Juncus         |
| <i>Juncus pallidus</i>                          | Juncus       | <i>Pontederia cordata</i>                            | Pontederia     |
| <i>Juncus tenuis</i>                            | Juncus       | <i>Pontederia sagittata</i>                          | Pontederia     |
| <i>Juncus torreyi</i>                           | Juncus       | <i>Potamogeton distinctus</i> A.Benn.                | Potamogeton    |
| <i>Leersia oryzoides</i>                        | Leersia      | <i>Potamogeton natans</i>                            | Potamogeton    |
| <i>Lemna minor</i>                              | Lemna        | <i>Potamogeton pectinatus</i>                        | Potamogeton    |
| <i>Ludwigia leptocarpa</i>                      | Ludwigia     | <i>Potamogeton illinoensis</i>                       | Potamogeton    |
| <i>Ludwigia peruviana</i>                       | Ludwigia     | <i>Ranunculus sceleratus</i> L.                      | Ranunculus     |
| <i>Lycopus americana</i>                        | Lycopus      | <i>Rudbeckia hirta</i>                               | Rudbeckia      |
| <i>Lysimachia christinae</i>                    | Lysimachia   | <i>Rumex crispus</i>                                 | Rumex          |
| <i>Lysimachia vulgaris</i> L.                   | Lysimachia   | <i>Sagittaria lancifolia</i>                         | Sagittaria     |
| <i>Lysimachia ciliata</i>                       | Lysimachia   | <i>Sagittaria latifolia</i>                          | Sagittaria     |
| <i>Lythrum anceps</i> (Koehne) Makino           | Lythrum      | <i>Salicornia europaea</i>                           | Salicornia     |
| <i>Lythrum salicaria</i> L.                     | Lythrum      | <i>Salix caroliniana</i>                             | Salix          |
| <i>Mikania scandens</i>                         | Mikania      | <i>Salix gracilistyla</i> Miq.                       | Salix          |
| <i>Miscanthus sacchariflorus</i> (Maxim.) Hack. | Miscanthus   | <i>Salix pierotii</i> Miq.                           | Salix          |
| <i>Monochoria vaginalis</i> (Burm.f.) C.Presl   | Monochoria   | <i>Saururus cernuus</i>                              | Saururus       |
| <i>Myriophyllum aquaticum</i>                   | Myriophyllum | <i>Schoenoplectus americanus</i>                     | Schoenoplectus |
| <i>Myriophyllum quitense</i> Kunth.             | Myriophyllum | <i>Schoenoplectus californicus</i>                   | Schoenoplectus |
| <i>Najas guadalupensis</i> Spreng               | Najas        | <i>Schoenoplectus tabernaemontani</i>                | Schoenoplectus |
| <i>Najas marina</i>                             | Najas        | <i>Schoenoplectus validus</i>                        | Schoenoplectus |
| <i>Nymphaea odorata</i>                         | Nymphaea     | <i>Scirpus atrovirens</i>                            | Scirpus        |
| <i>Nymphaea tetragona</i> Georgi                | Nymphaea     | <i>Scirpus cyperinus</i>                             | Scirpus        |
| <i>Nymphoides peltata</i> (S. G. Gmel.) Kuntze  | Nymphoides   | <i>Solidago canadensis</i>                           | Solidago       |
| <i>Oenanthë javanica</i> (Blume) DC.            | Oenanthë     | <i>Sonchus arvensis</i>                              | Sonchus        |

| Species                                    | Genus      | Species                               | Genus       |
|--------------------------------------------|------------|---------------------------------------|-------------|
| <i>Panicum hemitomom</i>                   | Panicum    | <i>Spartina pectinata</i>             | Spartina    |
| <i>Panicum virgatum</i>                    | Panicum    | <i>Spergularia canadensis</i>         | Spergularia |
| <i>Peltandra virginica</i>                 | Peltandra  | <i>Spirodela polyrrhiza</i>           | Spirodela   |
| <i>Persicaria hydropiper</i> (L.) Delarbre | Persicaria | <i>Themeda australis</i>              | Themeda     |
| <i>Persicaria hydropiperoides</i>          | Persicaria | <i>Trifolium pratense</i>             | Trifolium   |
| <i>Phalaris arundinacea</i> L.             | Phalaris   | <i>Trifolium repens</i>               | Trifolium   |
| <i>Phragmites australis</i>                | Phragmites | <i>Triglochin procera</i>             | Triglochin  |
| <i>Phragmites japonicus</i> Steud.         | Phragmites | <i>Typha angustifolia</i> L.          | Typha       |
| <i>Phyla nodiflora</i>                     | Phyla      | <i>Typha domingensis</i>              | Typha       |
| <i>Pistia stratiotes</i>                   | Pistia     | <i>Typha latifolia</i> L.             | Typha       |
| <i>Pluchea odorata</i>                     | Pluchea    | <i>Typha orientalis</i>               | Typha       |
| <i>Poa palustris</i>                       | Poa        | <i>Verbena hastata</i>                | Verbena     |
| <i>Poa pratensis</i>                       | Poa        | <i>Verbena urticifolia</i>            | Verbena     |
| <i>Polygonum densiflorum</i>               | Polygonum  | <i>Vernonia fasciculata</i>           | Vernonia    |
| <i>Polygonum persicaria</i>                | Polygonum  | <i>Veronica anagallis-aquatica</i> L. | Veronica    |
| <i>Veronica perigrina</i>                  | Veronica   |                                       |             |
| <i>Veronica serpyllifolia</i> L.           | Veronica   |                                       |             |
| <i>Veronica undulata</i> Wall.             | Veronica   |                                       |             |
| <i>Vicia villosa</i>                       | Vicia      |                                       |             |
